# Supplementary material for: Identifying competing endogenous RNA regulatory networks and hub genes in alcoholic liver disease for early diagnosis and potential therapeutic target insights
Source: publisher site journal article supplement (doi:10.18632/aging.205861), 2024-05-24
Supplement: Supplementary file [file aging-v16i10-205861-supplementary-material-SD1.pdf]

## SUPPLEMENTARY TABLE

**Supplementary Table 1. Co-regulation differential genes at Venn diagram intersection of Figure 8.**

| <b>Name</b> |
|-------------|
| RPL28       |
| TUBA1A      |
| ATP6V0D1    |
| LASP1       |
| ERLIN2      |
| RAB6A       |
| AFF1        |
| MCL1        |
| RAB5C       |
| SPARC       |
| RAP1A       |
| CSNK2B      |
| SFPQ        |
| TCP1        |
| SSR1        |
| IGHM        |
| TNFAIP2     |
| ANXA2       |
| BECN1       |
| NMI         |
| TP53        |
| BAG5        |
| MYD88       |
| BAGE        |
| GTF2H1      |
| KLF9        |
| YME1L1      |
| MTMR3       |
| TAOK2       |
| IGHG1       |
| LIMS1       |
| EDNRB       |
| UBE2I       |
| IGFBP5      |
| ROCK1       |
| NAP1L1      |
| B4GALT1     |
| AKAP7       |
| VCL         |
| C7          |
| TSC1        |
| DDR1        |

ADH5  
HLA-F  
PPP5C  
ASPH  
UBE2L3  
NPC2  
SKAP2  
CD86  
CLEC4M  
SNRPD3  
FCN2  
ING1  
SMARCA2  
PCOLCE  
KLRD1  
HES1  
CAMK2G  
NEDD8  
ACADL

---
